# Supplementary material
Source: publisher figshare collection journal article supplement (https://acs.figshare.com/ndownloader/files/24205074)
Supplement: Supplementary file 1 [file 24205074]

**Supporting Information**

**Evaluation of the relationship between momentum  
wakes behind moving vehicles and dispersion of  
vehicle emissions using near roadway measurements**

Yu Ting Yu<sup>†‡</sup>, Sheng Xiang<sup>†‡</sup>, Kenneth E. Noll<sup>\*†</sup>

<sup>†</sup> Department of Civil, Architecture and Environmental Engineering, Illinois Institute of  
Technology, Chicago, IL 60616, USA.

<sup>‡</sup> School of Environment, State Key Joint Laboratory of Environment Simulation and  
Pollution Control, Tsinghua University, Beijing 100084, PR China

\*Corresponding author contact information: noll@iit.edu

There are 3 table and 2 figures in total in the SI.

Number of pages: 11



**S1. Instrumentation.** Table S1. Summary of technical description of the instruments used in this study.

| Equipment                | Manufactory     | Measured variables                  | Time Resolution | Accuracy                  |
|--------------------------|-----------------|-------------------------------------|-----------------|---------------------------|
| AQ-Expert                | E-Instruments   | CO <sub>2</sub> ,                   | 10 s            | ±2% of reading<br>±10 ppm |
| P-trak 8525              | TSI instrument  | UFP number concentration            | 1 s             | Not specified             |
| 3D-ultrasonic anemometer | Gill instrument | Wind speed                          | 1 s             | <1.5% @ 12m/s             |
|                          |                 | Wind direction                      | 1 s             | <2° @ 12m/s               |
| Digital record           | Sony            | Vehicle flow rate,<br>Vehicle speed | n.a.            | n.a.                      |

In this study, all the instruments were operated simultaneously with 5-min sampling interval. Each 5-min was a separate sampling period.



**S2. Determination of initial  $\sigma_z$ .** Based on the relationship between vehicle height and wake length shown in Fig.5 (regression line), the “wake length” for this study can be determined as 11.9 m and 100.4 m for cars and trucks, respectively ( $H_{LDV}=1.4$  m and  $H_{HDV}=4.1$  m). By applying the derived “wake length” and vehicle height into the “wake area model” (Eq. (7)-(9)) (see section 2.1), the “effective wake area” can be determined as 16.7 m<sup>2</sup> for one LDV and 411.7 m<sup>2</sup> for one HDV. With vehicle density that measured from field measurements and “wake area model” (Eq. (7)-(9)),  $\sigma_{z,init,WAKE}$  that related to vehicles can be determined (see Table S2).

$\sigma_{z,init}$  for CALINE4 and AERMOD were back calculated by running the dispersion models. The vehicle flow rate, emission factors and meteorological data were first entered into CALINE4 and AERMOD to calculate pollutant concentrations. When running the CALINE4 and AERMOD, surface roughness was set as 0.01 m for LSD (covered by sands and grass) and 0.05 m for DRE (covered by grass and low-rise building)<sup>1</sup>. Then applied Eq. (10) to back calculate  $\sigma_{z,init}$  for CALINE4 and AERMOD.



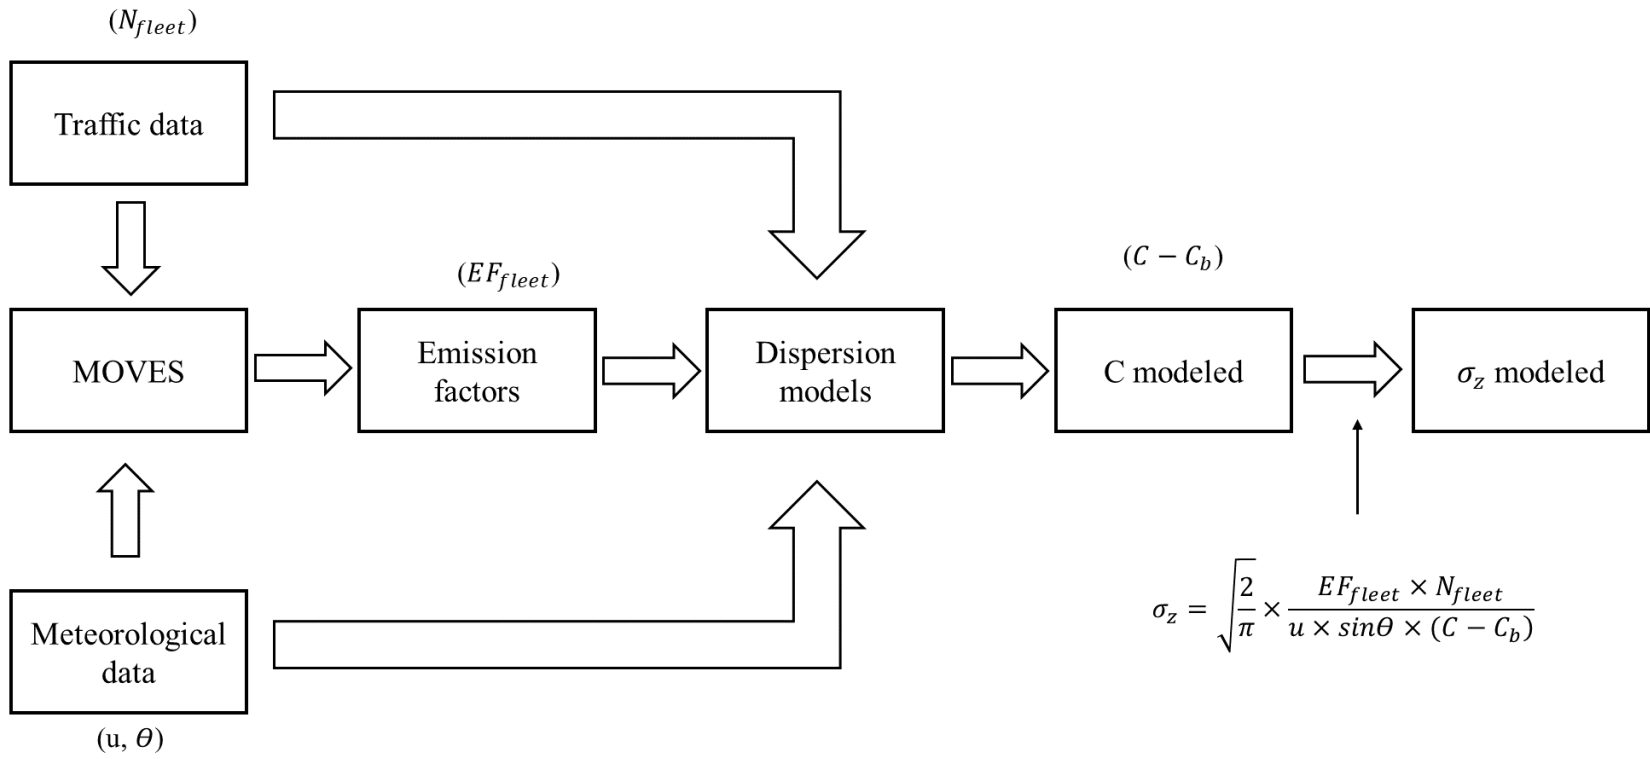

48

49 Figure S.1. Flow diagram of back calculated  $\sigma_{z,init}$  for CALINE4 and AERMOD with critical factors identified.



**S3. Calculation of Pollutant Concentrations.** Pollutant concentrations were calculated by Eq. (S.1) that is a transformation of Eq. (4). The  $C_{calculated}$  is the calculated pollutant concentrations contributed by vehicles (background subtracted). The definition of the components ( $EF_{fleet}, N_{fleet}, u, \theta$ ) are provided in the main text (Section 1.2).

$$C_{calculated} = \sqrt{\frac{2}{\pi}} \times \frac{EF_{fleet} \times N_{fleet}}{u \times \sin\theta \times \sigma_z} \quad \text{Eq. (S.1)}$$

Pollutant concentrations were calculated by inputting  $\sigma_{z,init,WAKE}$  parameterized in this study and directly running CALINE4 and AERMOD. Then the calculated pollutant concentrations were compared to our previous concentration measurements<sup>2,3</sup>.



68 Table S1 presents the data from previous measurements and results of example  
69 calculation in this study near LSD and DRE. The data interval of  $7,000 \text{ veh h}^{-1} \leq \text{total}$   
70  $\text{flow rate} < 8,000 \text{ veh h}^{-1}$  near LSD and DRE is selected because it has the largest amount  
71 of retrievable data ( $n=173$ ). The main calculation process of simulated pollutant  
72 concentrations is shown in Fig. S2.

73



Table S2. Example calculations using Eq. (S.1) for  $7,000 \text{ veh h}^{-1} \leq \text{total flow rate} < 8,000 \text{ veh h}^{-1}$  data interval near LSD and DRE from previous measurements<sup>1,2</sup>. Only average data for each 1,000 data intervals under free flow driving conditions were used for comparison.

| Roadway                                                                         | LSD                         | DRE                  | DRE                  | DRE                  | DRE                  | DRE                  |
|---------------------------------------------------------------------------------|-----------------------------|----------------------|----------------------|----------------------|----------------------|----------------------|
| Perpendicular wind speed (m)                                                    | 1.3                         | 1.7                  | 1.7                  | 1.7                  | 1.7                  | 1.7                  |
| CO <sub>2</sub> fleet EF ( $\times 10^{-3} \text{ g m}^{-1} \text{ veh}^{-1}$ ) | 175                         | 192                  | 213                  | 236                  | 262                  | 300                  |
| UFP fleet EF ( $\text{pt m}^{-1} \text{ veh}^{-1}$ )                            | $1.2 \times 10^{10}$        | $2.5 \times 10^{10}$ | $4.4 \times 10^{10}$ | $5.7 \times 10^{10}$ | $6.4 \times 10^{10}$ | $7.5 \times 10^{10}$ |
| HDV flow rate ( $\text{veh h}^{-1}$ )                                           | 0                           | 141                  | 304                  | 481                  | 663                  | 810                  |
| LDV flow rate ( $\text{veh h}^{-1}$ )                                           | 7350                        | 7418                 | 7097                 | 7026                 | 6890                 | 6870                 |
| HDV density ( $\times 10^{-3} \text{ m}^{-1}$ )                                 | n.a                         | 1.5                  | 3.3                  | 5.4                  | 7.6                  | 9.7                  |
| LDV density ( $\times 10^{-3} \text{ m}^{-1}$ )                                 | 74                          | 66                   | 63                   | 64                   | 62                   | 68                   |
| $\sigma_{z,init}$ (m)                                                           | Parameterized <sup>#</sup>  | 2.94                 | 3.52                 | 4.21                 | 5.09                 | 5.96                 |
|                                                                                 | CALINE4                     | 2.81                 | 2.40                 | 2.40                 | 2.40                 | 2.40                 |
|                                                                                 | AERMOD                      | 3.51                 | 4.28                 | 4.30                 | 4.31                 | 4.33                 |
| $C_{calculated}$ ( $\text{g m}^{-3}$ )                                          | Parameterized <sup>\$</sup> | 0.075                | 0.054                | 0.049                | 0.046                | 0.043                |
|                                                                                 | CALINE4                     | 0.078                | 0.079                | 0.086                | 0.097                | 0.108                |
|                                                                                 | AERMOD                      | 0.062                | 0.043                | 0.046                | 0.050                | 0.054                |
| CO <sub>2</sub> measured <sup>%</sup> ( $\text{g m}^{-3}$ )                     | 0.080                       | 0.052                | 0.051                | 0.052                | 0.054                | 0.052                |
| $C_{calculated}$ ( $\text{pt cm}^{-3}$ )                                        | Parameterized <sup>\$</sup> | 5136                 | 7018                 | 10109                | 10985                | 10594                |
|                                                                                 | CALINE4                     | 5370                 | 10305                | 17758                | 23335                | 26361                |
|                                                                                 | AERMOD                      | 4284                 | 5645                 | 9478                 | 12113                | 13289                |
| UFP measured ( $\text{pt cm}^{-3}$ )                                            | 5616                        | 7385                 | 11371                | 11882                | 13839                | 13411                |

<sup>#</sup>: Parameterized  $\sigma_{z,init,WAKE}$  is calculated based on Eq. (7)-(9) with vehicle density from field measurements and  $\sigma_z$  that not related to vehicles (1.7m for LSD, 1.8m for DRE).

<sup>\$</sup>: Calculated concentrations are calculated by applying parameterized  $\sigma_{z,init,WAKE}$  to Eq. (S.1) with vehicle emission data ( $EF_{fleet}$ ,  $N_{fleet}$ ) and meteorology data ( $u$ ,  $\theta$ ) from field measurements.

<sup>%</sup>: Measured concentrations are background subtracted.



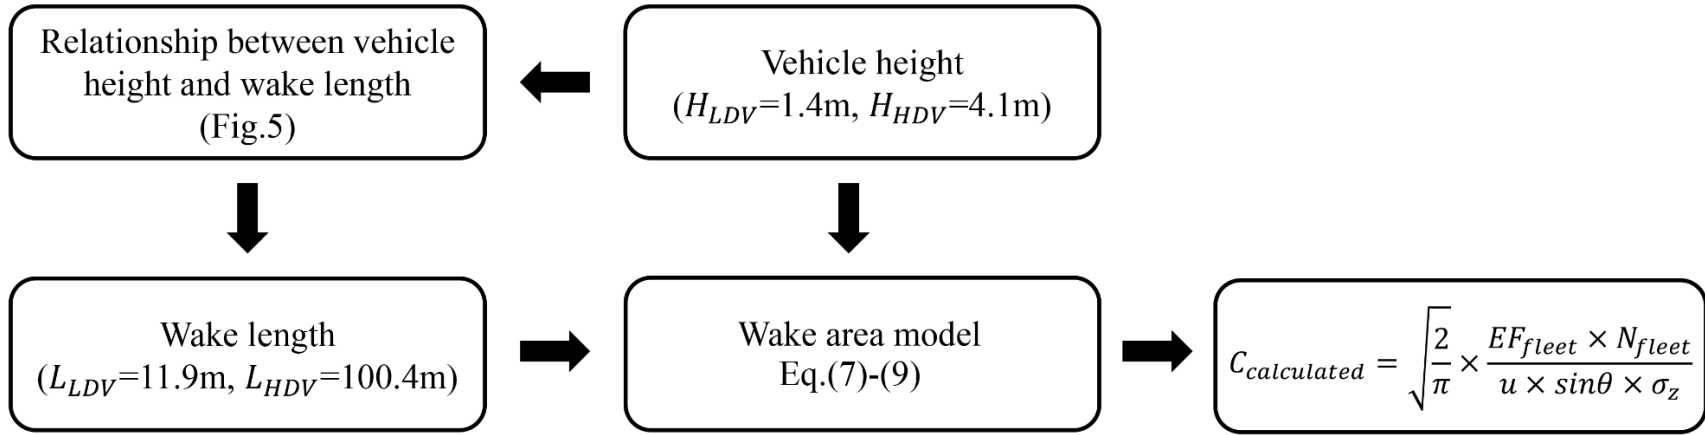

Fig. S2. The flow chart for calculation of pollutant concentrations with parameterized  $\sigma_{z,init,WAKE}$ .



**S4. Model performance measures.** Calculated concentrations from the models were compared to field measurements and model performance were quantified using common statistical parameters<sup>4</sup>. These parameters include Pearson correlation (R), normalized mean square error (NMSE), fractional bias (FB), and the fraction of data within a factor of two (FAC2). These parameters are defined using notation of  $C_o$  and  $C_p$  for observed and predicted concentrations, respectively. For our case,  $C_o$  is the field measured concentrations,  $C_p$  is the model calculations.

The parameters are defined as following:

$$R = \frac{(\overline{C_o} - \overline{C_p})(\overline{C_p} - \overline{C_o})}{\sigma_{C_o}\sigma_{C_p}} \quad \text{Eq. (S.2)}$$

$$NMSE = \frac{(\overline{C_o} - \overline{C_p})^2}{\overline{C_o}\overline{C_p}} \quad \text{Eq. (S.3)}$$

$$FB = \frac{(\overline{C_o} - \overline{C_p})}{0.5(\overline{C_o} + \overline{C_p})} \quad \text{Eq. (S.4)}$$

By definition, FAC2 is the fraction of model prediction within the range:

$$0.5 \leq \frac{C_p}{C_o} \leq 2 \quad \text{Eq. (S.5)}$$

R is a measure of how well the linear relationship between the measure and model results, with a range of -1 to 1. A value of 0 means no correlation, and  $\pm 1$  means a perfect correlation. NMSE is a measure evaluating the deviation of model results on point to point basis, and 0 value indicates ideal model performance. FB is a measure showing correlation between measure and model results on average basis, with a range of -2 to 2.



Where the negative and positive values indicate over- and underpredict of measurements, respectively. A value of 0 indicates ideal model performance. FAC2 is a measure showing the fraction of data falling into the “factor of two envelope”, a value of 1 indicate ideal model performance.

Table S3. Overall performance of calculated pollutant concentrations against pollutant concentrations field measurement that derived from Fig. 7.

| Model           | R <sup>a</sup>  |      | NMSE <sup>b</sup> |      | FB <sup>c</sup> |       | FAC2 <sup>d</sup> |      |
|-----------------|-----------------|------|-------------------|------|-----------------|-------|-------------------|------|
|                 | CO <sub>2</sub> | UFP  | CO <sub>2</sub>   | UFP  | CO <sub>2</sub> | UFP   | CO <sub>2</sub>   | UFP  |
| Wake Area Model | 0.92            | 0.92 | 0.02              | 0.11 | 0.01            | 0.14  | 1                 | 1    |
| CALINE4         | 0.50            | 0.47 | 0.21              | 0.26 | -0.23           | -0.25 | 0.80              | 0.83 |
| AERMOD          | 0.63            | 0.82 | 0.16              | 0.17 | 0.13            | 0.24  | 0.90              | 0.93 |

In Table S3, compared to CALINE4 and AERMOD, the “wake area model” showed larger value of R and lower NMSE. This indicated that there is stronger linear relationship and smaller differences between the calculated concentrations from “wake area model” and the measured concentrations. The “wake are model” showed FB value close to 0 and FAC2 with value of 1. This indicated that the calculated average concentrations from the “wake area model” were closer to the field measurements compared to CALINE4 and AERMOD with no extreme under- and overpredictions.



## Reference

1. Arya, P.S., **2001**. Introduction to micrometeorology. Elsevier.
2. Xiang, S.; Yu, Y. T.; Hu, Z.; Noll, K. E., Characterization of dispersion and ultrafine-particle emission factors based on near-roadway monitoring Part II: Heavy duty vehicles. *Aerosol and Air Quality Research* **2019**, *19*, 2421-2431.
3. Xiang, S.; Yu, Y. T.; Hu, Z.; Noll, K. E., Characterization of Dispersion and Ultrafine-particle Emission Factors Based on Near-roadway Monitoring Part I: Light Duty Vehicles. *Aerosol and Air Quality Research* **2019**, *19*, 2410-2420.
4. Chang, J.C. and Hanna, S.R., **2004**. Air quality model performance evaluation. *Meteorology and Atmospheric Physics*, 87(1-3), pp.167-196.
